# Supplementary material for: Safety and Tolerability of Intravenous Immunoglobulin in Chronic Inflammatory Demyelinating Polyneuropathy: Results of the ProCID Study
Source: PubMed Central journal article supplement — Drug Saf. 2023 Jun 28;46(9):835–45. doi: 10.1007/s40264-023-01326-z (PMC10442284; doi:10.1007/s40264-023-01326-z), 2023-06-28
Supplement: 40264_2023_1326_MOESM1_ESM.pdf [file 40264_2023_1326_MOESM1_ESM.pdf]

# **Safety and tolerability of intravenous immunoglobulin in chronic inflammatory demyelinating polyneuropathy: Results of the ProCID Study**

## ***Drug Safety***

David R. Cornblath<sup>1,\*</sup>, Pieter A. van Doorn<sup>2</sup>, Hans-Peter Hartung<sup>3-6</sup>, Ingemar S.J. Merkies<sup>7,8</sup>, Hans D. Katzberg<sup>9</sup>, Doris Hinterberger<sup>10</sup>, Elisabeth Clodi<sup>10</sup>, and the ProCID Investigators

## **Author affiliations:**

1 Department of Neurology, Johns Hopkins University, Baltimore, MD 21287, USA

2 Department of Neurology, Erasmus University Medical Center, Rotterdam, 3015CE, The Netherlands

3 Department of Neurology, Heinrich Heine University, Medical Faculty, Düsseldorf, 40225, Germany

4 Brain and Mind Center, University of Sydney, Sydney, NSW 2050, Australia

5 Department of Neurology, Medical University of Vienna, Vienna, 1090, Austria

6 Department of Neurology, Palacky University, Olomouc, 771 47, Czech Republic

7 Department of Neurology, Maastricht University Medical Center, Maastricht, 6229 HX, The Netherlands

8 Curaçao Medical Center, Willemstad, Curaçao

9 Department of Neurology, University of Toronto, Toronto, M5G 2C4, Canada

10 Octapharma PPG, Vienna, 1100, Austria

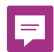

\*Correspondence to: David R. Cornblath, MD, dcornbl@jhmi.edu

**Supplementary table 1 Related TEAEs per treatment group.** n = number of patients; n' = number of infusions; N = number of events.

| System organ class<br>Preferred term                 | Treatment group      |         |   |                      |          |    |                      |          |    | Total                     |          |    |
|------------------------------------------------------|----------------------|---------|---|----------------------|----------|----|----------------------|----------|----|---------------------------|----------|----|
|                                                      | 0.5 g/kg<br>(n = 35) |         |   | 1.0 g/kg<br>(n = 69) |          |    | 2.0 g/kg<br>(n = 38) |          |    | All patients<br>(n = 142) |          |    |
|                                                      | n (%)                | n' (%)  | N | n (%)                | n' (%)   | N  | n (%)                | n' (%)   | N  | n (%)                     | n' (%)   | N  |
| Nervous system disorders                             |                      |         |   |                      |          |    |                      |          |    |                           |          |    |
| Headache                                             | 1 (2.9)              | 1 (0.4) | 1 | 10 (14.5)            | 11 (2.3) | 12 | 9 (23.7)             | 13 (4.8) | 15 | 20 (14.1)                 | 25 (2.5) | 28 |
| Dizziness                                            | 1 (2.9)              | 1 (0.4) | 1 |                      |          |    | 1 (2.6)              | 1 (0.4)  | 1  | 2 (1.4)                   | 2 (0.2)  | 2  |
| Somnolence                                           | 2 (5.7)              | 3 (1.3) | 3 |                      |          |    | 1 (2.6)              | 1 (0.4)  | 1  | 3 (2.1)                   | 4 (0.4)  | 4  |
| General disorders and administration site conditions |                      |         |   |                      |          |    |                      |          |    |                           |          |    |
| Pyrexia                                              | 5 (14.3)             | 6 (2.6) | 6 | 8 (11.6)             | 9 (1.9)  | 11 | 5 (13.2)             | 5 (1.9)  | 6  | 18 (12.7)                 | 20 (2.0) | 23 |
| Chills                                               | 3 (8.6)              | 4 (1.7) | 4 | 2 (2.9)              | 2 (0.4)  | 2  | 1 (2.6)              | 1 (0.4)  | 1  | 6 (4.2)                   | 7 (0.7)  | 7  |
| Asthenia                                             |                      |         |   |                      |          |    | 1 (2.6)              | 1 (0.4)  | 1  | 1 (0.7)                   | 1 (0.1)  | 1  |
| Chest pain                                           |                      |         |   |                      |          |    | 1 (2.6)              | 1 (0.4)  | 1  | 1 (0.7)                   | 1 (0.1)  | 1  |
| Influenza like illness                               |                      |         |   | 3 (4.4)              | 3 (0.6)  | 3  |                      |          |    | 3 (2.1)                   | 3 (0.3)  | 3  |
| Chest discomfort                                     |                      |         |   |                      |          |    | 1 (2.6)              | 2 (0.7)  | 2  | 1 (0.7)                   | 2 (0.2)  | 2  |
| Gastrointestinal disorders                           |                      |         |   |                      |          |    |                      |          |    |                           |          |    |
| Abdominal pain                                       |                      |         |   | 1 (1.5)              | 1 (0.2)  | 1  |                      |          |    | 1 (0.7)                   | 1 (0.1)  | 1  |
| Nausea                                               | 1 (2.9)              | 1 (0.4) | 1 | 1 (1.5)              | 2 (0.4)  | 2  | 3 (7.9)              | 4 (1.5)  | 5  | 5 (3.5)                   | 7 (0.7)  | 8  |
| Vomiting                                             |                      |         |   | 2 (2.9)              | 3 (0.6)  | 3  | 1 (2.6)              | 1 (0.4)  | 1  | 3 (2.1)                   | 4 (0.4)  | 4  |
| Diarrhoea                                            |                      |         |   |                      |          |    | 1 (2.6)              | 1 (0.4)  | 1  | 1 (0.7)                   | 1 (0.1)  | 1  |
| Blood and lymphatic system disorders                 |                      |         |   |                      |          |    |                      |          |    |                           |          |    |
| Leukopenia                                           | 1 (2.9)              | 2 (0.9) | 2 | 2 (2.9)              | 2 (0.4)  | 2  |                      |          |    | 3 (2.1)                   | 4 (0.4)  | 4  |
| Anaemia                                              |                      |         |   |                      |          |    | 1 (2.6)              | 1 (0.4)  | 1  | 1 (0.7)                   | 1 (0.1)  | 1  |
| Respiratory, thoracic and mediastinal disorders      |                      |         |   |                      |          |    |                      |          |    |                           |          |    |
| Cough                                                |                      |         |   | 1 (1.5)              | 1 (0.2)  | 1  | 1 (2.6)              | 1 (0.4)  | 1  | 2 (1.4)                   | 2 (0.2)  | 2  |
| Tachypnoea                                           |                      |         |   | 1 (1.5)              | 1 (0.2)  | 4  |                      |          |    | 1 (0.7)                   | 1 (0.1)  | 4  |
| Dyspnoea                                             |                      |         |   |                      |          |    | 1 (2.6)              | 1 (0.4)  | 1  | 1 (0.7)                   | 1 (0.1)  | 1  |
| Cardiac disorders                                    |                      |         |   |                      |          |    |                      |          |    |                           |          |    |
| Tachycardia                                          | 1 (2.9)              | 1 (0.4) | 1 | 2 (2.9)              | 2 (0.4)  | 4  | 1 (2.6)              | 1 (0.4)  | 1  | 4 (2.8)                   | 4 (0.4)  | 6  |
| Skin and subcutaneous tissue disorders               |                      |         |   |                      |          |    |                      |          |    |                           |          |    |
| Rash                                                 | 1 (2.9)              | 1 (0.4) | 1 | 1 (1.5)              | 1 (0.2)  | 1  | 1 (2.6)              | 5 (1.9)  | 5  | 3 (2.1)                   | 7 (0.7)  | 7  |
| Dermatitis                                           | 5 (14.3)             | 5 (2.2) | 5 | 5 (7.3)              | 10 (2.1) | 10 | 4 (10.5)             | 5 (1.9)  | 6  | 14 (9.9)                  | 20 (2.0) | 21 |
| Skin exfoliation                                     | 1 (2.9)              | 1 (0.4) | 1 | 2 (2.9)              | 2 (0.4)  | 3  | 1 (2.6)              | 1 (0.4)  | 1  | 4 (2.8)                   | 4 (0.4)  | 5  |
| Urticaria                                            | 3 (8.6)              | 4 (1.7) | 4 |                      |          |    |                      |          |    | 3 (2.1)                   | 4 (0.4)  | 4  |

|                                       |         |         |   |         |         |   |         |         |   |         |         |    |
|---------------------------------------|---------|---------|---|---------|---------|---|---------|---------|---|---------|---------|----|
| Pruritus                              |         |         |   |         |         |   | 2 (5.3) | 3 (1.1) | 3 | 2 (1.4) | 3 (0.3) | 3  |
| Erythema                              | 1 (2.9) | 2 (0.9) | 2 |         |         |   |         |         |   | 1 (0.7) | 2 (0.2) | 2  |
| Vascular disorders                    |         |         |   |         |         |   |         |         |   |         |         |    |
| Hypertension                          | 2 (5.7) | 3 (1.3) | 3 | 5 (7.3) | 6 (1.2) | 7 |         |         |   | 7 (4.9) | 9 (0.9) | 10 |
| Hypotension                           | 1 (2.9) | 1 (0.4) | 1 |         |         |   |         |         |   | 1 (0.7) | 1 (0.1) | 1  |
| Investigations                        |         |         |   |         |         |   |         |         |   |         |         |    |
| Blood lactate dehydrogenase increased |         |         |   | 5 (7.3) | 5 (1.0) | 5 |         |         |   | 5 (3.5) | 5 (0.5) | 5  |
| Transaminases increased               | 1 (2.9) | 1 (0.4) | 1 | 2 (2.9) | 2 (0.4) | 2 |         |         |   | 3 (2.1) | 3 (0.3) | 3  |
| Alanine aminotransferase increased    |         |         |   | 2 (2.9) | 3 (0.6) | 3 |         |         |   | 2 (1.4) | 3 (0.3) | 3  |
| Aspartate aminotransferase increased  |         |         |   | 2 (2.9) | 3 (0.6) | 3 |         |         |   | 2 (1.4) | 3 (0.3) | 3  |
| Haemoglobin decreased                 |         |         |   | 1 (1.5) | 1 (0.2) | 1 |         |         |   | 1 (0.7) | 1 (0.1) | 1  |
| Infections and infestations           |         |         |   |         |         |   |         |         |   |         |         |    |
| Nasopharyngitis                       |         |         |   |         |         |   | 1 (2.6) | 1 (0.4) | 1 | 1 (0.7) | 1 (0.1) | 1  |
| Renal and urinary disorders           |         |         |   |         |         |   |         |         |   |         |         |    |
| Micturition urgency                   |         |         |   |         |         |   | 1 (2.6) | 1 (0.4) | 1 | 1 (0.7) | 1 (0.1) | 1  |

TEAE = treatment-emergent adverse event.

**Supplementary table 2 Related TEAEs for daily doses below and above 78 g IVIg.** n = number of patients; n' = number of infusions; N = number of events. The combined number of patients in both groups is higher than the number of randomised patients because different doses were administered during the loading and maintenance phases.

| System organ class<br>Preferred term                 | Actual daily dose |           |    |                   |           |    |
|------------------------------------------------------|-------------------|-----------|----|-------------------|-----------|----|
|                                                      | ≤ 78g<br>(n = 89) |           |    | > 78g<br>(n = 80) |           |    |
|                                                      | n (%)             | n' (%)    | N  | n (%)             | n' (%)    | N  |
| Any term                                             | 37 (41.6)         | 59 (11.2) | 96 | 34 (42.5)         | 53 (11.6) | 77 |
| Nervous system disorders                             |                   |           |    |                   |           |    |
| Headache                                             | 12 (13.5)         | 16 (3.0)  | 18 | 8 (10.0)          | 9 (2.0)   | 10 |
| Dizziness                                            | 2 (2.3)           | 2 (0.4)   | 2  |                   |           |    |
| Somnolence                                           | 3 (3.4)           | 4 (0.8)   | 4  |                   |           |    |
| General disorders and administration site conditions |                   |           |    |                   |           |    |
| Pyrexia                                              | 8 (9.0)           | 10 (1.9)  | 13 | 10 (12.5)         | 10 (2.2)  | 10 |
| Chills                                               | 4 (5.6)           | 6 (1.1)   | 6  | 1 (1.3)           | 1 (0.2)   | 1  |
| Asthenia                                             | 1 (1.1)           | 1 (0.2)   | 1  |                   |           |    |
| Chest pain                                           |                   |           |    | 1 (1.3)           | 1 (0.2)   | 1  |
| Influenza like illness                               | 2 (2.3)           | 2 (0.4)   | 2  | 1 (1.3)           | 1 (0.2)   | 1  |
| Chest discomfort                                     | 1 (1.1)           | 2 (0.4)   | 2  |                   |           |    |
| Gastrointestinal disorders                           |                   |           |    |                   |           |    |
| Abdominal pain                                       |                   |           |    | 1 (1.3)           | 1 (0.2)   | 1  |
| Nausea                                               | 3 (3.4)           | 4 (0.8)   | 4  | 2 (2.5)           | 3 (0.7)   | 4  |
| Vomiting                                             | 2 (2.3)           | 3 (0.6)   | 3  | 1 (1.3)           | 1 (0.2)   | 1  |
| Diarrhoea                                            | 1 (1.1)           | 1 (0.2)   | 1  |                   |           |    |
| Blood and lymphatic system disorders                 |                   |           |    |                   |           |    |
| Leukopenia                                           | 2 (2.3)           | 3 (0.6)   | 3  | 1 (1.3)           | 1 (0.2)   | 1  |
| Anaemia                                              | 1 (1.1)           | 1 (0.2)   | 1  |                   |           |    |
| Respiratory, thoracic and mediastinal disorders      |                   |           |    |                   |           |    |
| Cough                                                |                   |           |    | 2 (2.5)           | 2 (0.4)   | 2  |
| Tachypnoea                                           | 1 (1.1)           | 1 (0.2)   | 4  |                   |           |    |
| Dyspnoea                                             | 1 (1.1)           | 1 (0.2)   | 1  |                   |           |    |
| Cardiac disorders                                    |                   |           |    |                   |           |    |
| Tachycardia                                          | 3 (3.4)           | 3 (0.6)   | 5  | 1 (1.3)           | 1 (0.2)   | 1  |
| Skin and subcutaneous tissue disorders               |                   |           |    |                   |           |    |
| Rash                                                 | 1 (1.1)           | 1 (0.2)   | 1  | 2 (2.5)           | 6 (1.3)   | 6  |
| Dermatitis                                           | 6 (6.7)           | 7 (1.3)   | 8  | 8 (10.0)          | 13 (2.9)  | 13 |
| Skin exfoliation                                     | 1 (1.1)           | 1 (0.2)   | 1  | 3 (3.8)           | 3 (0.7)   | 4  |
| Urticaria                                            | 2 (2.3)           | 2 (0.4)   | 2  | 2 (2.5)           | 2 (0.4)   | 2  |
| Pruritus                                             | 2 (2.3)           | 3 (0.6)   | 3  |                   |           |    |
| Erythema                                             | 1 (1.1)           | 2 (0.4)   | 2  |                   |           |    |
| Vascular disorders                                   |                   |           |    |                   |           |    |
| Hypertension                                         | 2 (2.3)           | 2 (0.4)   | 2  | 6 (7.5)           | 7 (1.5)   | 8  |
| Hypotension                                          | 1 (1.1)           | 1 (0.2)   | 1  |                   |           |    |
| Investigations                                       |                   |           |    |                   |           |    |
| Blood lactate dehydrogenase increased                | 2 (2.3)           | 2 (0.4)   | 2  | 3 (3.8)           | 3 (0.7)   | 3  |
| Transaminases increased                              | 2 (2.3)           | 2 (0.4)   | 2  | 1 (1.3)           | 1 (0.2)   | 1  |

|                                      |         |         |   |         |         |   |
|--------------------------------------|---------|---------|---|---------|---------|---|
| Alanine aminotransferase increased   |         |         |   | 2 (2.5) | 3 (0.7) | 3 |
| Aspartate aminotransferase increased |         |         |   | 2 (2.5) | 3 (0.7) | 3 |
| Haemoglobin decreased                |         |         |   | 1 (1.3) | 1 (0.2) | 1 |
| Infections and infestations          |         |         |   |         |         |   |
| Nasopharyngitis                      | 1 (1.1) | 1 (0.2) | 1 |         |         |   |

IVIg = intravenous immunoglobulin; TEAE = treatment-emergent adverse event.

**Supplementary table 3 Related adverse events per loading and maintenance dose.** n = number of patients; n' = number of infusions; N = number of events.

| System organ class<br>Preferred term                 | Loading dose          |              |    |                      |         |   | Maintenance dose     |         |   |                      |         |   |
|------------------------------------------------------|-----------------------|--------------|----|----------------------|---------|---|----------------------|---------|---|----------------------|---------|---|
|                                                      | 2.0 g/kg<br>(n = 141) |              |    | 0.5 g/kg<br>(n = 34) |         |   | 1.0 g/kg<br>(n = 66) |         |   | 2.0 g/kg<br>(n = 34) |         |   |
|                                                      | n (%)                 | n' (%)       | N  | n (%)                | n' (%)  | N | n (%)                | n' (%)  | N | n (%)                | n' (%)  | N |
| Nervous system disorders                             |                       |              |    |                      |         |   |                      |         |   |                      |         |   |
| Headache                                             | 15<br>(10.6)          | 15<br>(10.6) | 18 |                      |         |   | 3 (4.6)              | 3 (0.8) | 3 | 5 (14.7)             | 7 (3.0) | 7 |
| Dizziness                                            | 1 (0.7)               | 1 (0.7)      | 1  | 1 (2.9)              | 1 (0.6) | 1 |                      |         |   |                      |         |   |
| Somnolence                                           | 2 (1.4)               | 2 (1.4)      | 2  | 1 (2.9)              | 1 (0.6) | 1 |                      |         |   | 1 (2.9)              | 1 (0.4) | 1 |
| General disorders and administration site conditions |                       |              |    |                      |         |   |                      |         |   |                      |         |   |
| Pyrexia                                              | 14 (9.9)              | 14 (9.9)     | 17 | 2 (5.9)              | 3 (1.7) | 3 | 3 (4.6)              | 3 (0.8) | 3 |                      |         |   |
| Chills                                               | 5 (3.6)               | 5 (3.6)      | 5  | 1 (2.9)              | 2 (1.1) | 2 |                      |         |   |                      |         |   |
| Asthenia                                             | 1 (0.7)               | 1 (0.7)      | 1  |                      |         |   |                      |         |   |                      |         |   |
| Chest pain                                           | 1 (0.7)               | 1 (0.7)      | 1  |                      |         |   | 1 (1.5)              | 1 (0.3) | 1 |                      |         |   |
| Influenza like illness                               | 2 (1.4)               | 2 (1.4)      | 2  |                      |         |   |                      |         |   | 1 (2.9)              | 1 (0.4) | 1 |
| Chest discomfort                                     | 1 (0.7)               | 1 (0.7)      | 1  |                      |         |   |                      |         |   |                      |         |   |
| Gastrointestinal disorders                           |                       |              |    |                      |         |   |                      |         |   |                      |         |   |
| Abdominal pain                                       |                       |              |    |                      |         |   | 1 (1.5)              | 1 (0.3) | 1 |                      |         |   |
| Nausea                                               | 4 (2.8)               | 4 (2.8)      | 5  |                      |         |   | 1 (1.5)              | 1 (0.3) | 1 | 2 (5.9)              | 2 (0.9) | 2 |
| Vomiting                                             | 3 (2.1)               | 3 (2.1)      | 3  |                      |         |   | 1 (1.5)              | 1 (0.3) | 1 |                      |         |   |
| Diarrhoea                                            | 1 (0.7)               | 1 (0.7)      | 1  |                      |         |   |                      |         |   |                      |         |   |
| Blood and lymphatic system disorders                 |                       |              |    |                      |         |   |                      |         |   |                      |         |   |
| Leukopenia                                           | 1 (0.7)               | 1 (0.7)      | 1  | 1 (2.9)              | 2 (1.1) | 2 | 1 (1.5)              | 1 (0.3) | 1 |                      |         |   |
| Anaemia                                              | 1 (0.7)               | 1 (0.7)      | 1  |                      |         |   |                      |         |   |                      |         |   |
| Respiratory, thoracic and mediastinal disorders      |                       |              |    |                      |         |   |                      |         |   |                      |         |   |
| Cough                                                | 2 (1.4)               | 2 (1.4)      | 2  |                      |         |   |                      |         |   |                      |         |   |
| Tachypnoea                                           | 1 (0.7)               | 1 (0.7)      | 4  |                      |         |   |                      |         |   |                      |         |   |
| Dyspnoea                                             |                       |              |    |                      |         |   |                      |         |   | 1 (2.9)              | 1 (0.4) | 1 |
| Cardiac disorders                                    |                       |              |    |                      |         |   |                      |         |   |                      |         |   |
| Tachycardia                                          | 3 (2.1)               | 3 (2.1)      | 5  |                      |         |   |                      |         |   | 1 (2.9)              | 1 (0.4) | 1 |

| Skin and subcutaneous tissue disorders |         |         |   |         |         |   |         |         |   |         |         |   |
|----------------------------------------|---------|---------|---|---------|---------|---|---------|---------|---|---------|---------|---|
| Rash                                   |         |         |   | 1 (2.9) | 1 (0.6) | 1 | 1 (1.5) | 1 (0.3) | 1 | 1 (2.9) | 5 (2.2) | 5 |
| Dermatitis                             | 5 (3.6) | 5 (3.6) | 5 | 2 (5.9) | 2 (1.1) | 2 | 4 (6.1) | 8 (2.0) | 8 | 3 (8.8) | 4 (1.7) | 5 |
| Skin exfoliation                       |         |         |   | 1 (2.9) | 1 (0.6) | 1 | 2 (3.0) | 2 (0.5) | 3 | 1 (2.9) | 1 (0.4) | 1 |
| Urticaria                              | 3 (2.1) | 3 (2.1) | 3 | 1 (2.9) | 1 (0.6) | 1 |         |         |   |         |         |   |
| Pruritus                               | 1 (0.7) | 1 (0.7) | 1 |         |         |   |         |         |   | 2 (5.9) | 2 (0.9) | 2 |
| Erythema                               |         |         |   | 1 (2.9) | 2 (1.1) | 2 |         |         |   |         |         |   |
| Vascular disorders                     |         |         |   |         |         |   |         |         |   |         |         |   |
| Hypertension                           | 4 (2.8) | 4 (2.8) | 5 | 2 (5.9) | 2 (1.1) | 2 | 2 (3.0) | 3 (0.8) | 3 |         |         |   |
| Hypotension                            | 1 (0.7) | 1 (0.7) | 1 |         |         |   |         |         |   |         |         |   |
| Investigations                         |         |         |   |         |         |   |         |         |   |         |         |   |
| Blood lactate dehydrogenase increased  | 1 (0.7) | 1 (0.7) | 1 |         |         |   | 4 (6.1) | 4 (1.0) | 4 |         |         |   |
| Transaminases increased                | 1 (0.7) | 1 (0.7) | 1 | 1 (2.9) | 1 (0.6) | 1 | 1 (1.5) | 1 (0.3) | 1 |         |         |   |
| Alanine aminotransferase increased     | 1 (0.7) | 1 (0.7) | 1 |         |         |   | 2 (3.0) | 2 (0.5) | 2 |         |         |   |
| Aspartate aminotransferase increased   | 1 (0.7) | 1 (0.7) | 1 |         |         |   | 2 (3.0) | 2 (0.5) | 2 |         |         |   |
| Haemoglobin decreased                  |         |         |   |         |         |   | 1 (1.5) | 1 (0.3) | 1 |         |         |   |
| Infections and infestations            |         |         |   |         |         |   |         |         |   |         |         |   |
| Nasopharyngitis                        |         |         |   |         |         |   |         |         |   | 1 (2.9) | 1 (0.4) | 1 |

**Supplementary table 4 Selected reports relating to high-dose IVIg in a variety of diseases.**

| Publication                  | Disease area                                                       | Report type                                         | N  | IVIg treatment                                                                                                                                                                                                                                                  | Safety findings                                                                                                                                                                                                                                                                                                                                                                                                                                                                          |
|------------------------------|--------------------------------------------------------------------|-----------------------------------------------------|----|-----------------------------------------------------------------------------------------------------------------------------------------------------------------------------------------------------------------------------------------------------------------|------------------------------------------------------------------------------------------------------------------------------------------------------------------------------------------------------------------------------------------------------------------------------------------------------------------------------------------------------------------------------------------------------------------------------------------------------------------------------------------|
| Cherin P et al. (1991) [1]   | Chronic refractory polymyositis and dermatomyositis                | Single-centre report                                | 20 | IVIg was administered monthly in one of two ways: 1 g/kg/day during 2 days for 13 patients and 0.4 g/kg/day during 5 days for 7 patients. 14 patients received between 3 and 6 infusions, 2 patients received 1 infusion, and 4 patients had 12 IVIg infusions. | <ul style="list-style-type: none"> <li>• No premature discontinuation of IVIg because of lack of tolerance.</li> <li>• 16 patients experienced no side effects with IVIg.</li> <li>• Side effects were observed in 4 patients: headaches (1 patient), fever with shivering and sweating (2 patients), and delirium (1 patient). These adverse reactions disappeared spontaneously after discontinuation of the infusion and did not reoccur during subsequent IVIg infusions.</li> </ul> |
| Dalakas MC et al. (1993) [2] | Dermatomyositis                                                    | Double-blind, placebo controlled, cross-over report | 15 | IVIg 2 g/kg (over 2 days) per month for 3 months or placebo. After 3 months patients were crossed over. Total of 12 patients received IVIg.                                                                                                                     | <ul style="list-style-type: none"> <li>• In general, IVIg infusion were well tolerated.</li> <li>• 2 patients had recurrent headache with IVIg infusion necessitating treatment but stated benefit outweighed adverse event.</li> </ul>                                                                                                                                                                                                                                                  |
| Harman KE et al. (1999) [3]  | Autoimmune blistering diseases                                     | Case series                                         | 14 | IVIg 2 g/kg (over 5 days) for variable durations.                                                                                                                                                                                                               | <ul style="list-style-type: none"> <li>• Side effects occurred in 8 of the 14 patients and included tachycardia (3 patients), hypertension (4 patients), headache (3 patients), and myalgia (2 patients). These responded to slowing the rate of infusion and did not prevent continued treatment.</li> </ul>                                                                                                                                                                            |
| Engineer L et al. (2000) [4] | Pemphigus vulgaris                                                 | Retrospective analysis                              | 21 | 1.2–2 g/kg per cycle over 3–5 consecutive days for variable durations (1 patient received 39 g daily over 3-5 days).                                                                                                                                            | <ul style="list-style-type: none"> <li>• No significant side effects were observed in any of the 21 patients during the follow-up.</li> </ul>                                                                                                                                                                                                                                                                                                                                            |
| Levy Y et al. (2000) [5]     | Systemic sclerosis                                                 | Case series                                         | 3  | 6 monthly IVIg infusion cycles (2 g/kg over 5 days). 2 patients received 6 cycles as planned and 1 patient received 3 cycles.                                                                                                                                   | <ul style="list-style-type: none"> <li>• No adverse events were reported for the 2 patients who completed 6 IVIg cycles.</li> <li>• The third patient who received 3 cycles developed renal failure and died of sepsis, which was considered unlikely to be related to IVIg.</li> </ul>                                                                                                                                                                                                  |
| Dalakas MC et al. (2001) [6] | Stiff-person syndrome                                              | Randomised trial report                             | 16 | IVIg 2 g/kg (over 2 days) per month for 3 months.                                                                                                                                                                                                               | <ul style="list-style-type: none"> <li>• No comment on safety.</li> <li>• 1 patient withdrew due to severe blistering rash after each infusion.</li> </ul>                                                                                                                                                                                                                                                                                                                               |
| Vo AA et al. (2008) [7]      | Renal transplantation                                              | Single-centre report                                | 20 | IVIg given twice (2 g/kg) on day 0 and day 30.                                                                                                                                                                                                                  | <ul style="list-style-type: none"> <li>• No infusion-related side effects.</li> </ul>                                                                                                                                                                                                                                                                                                                                                                                                    |
| Attarian S et al. (2010) [8] | Chronic ataxic neuropathy associated with anti-GD1b IgM antibodies | Retrospective, uncontrolled, single-centre report   | 13 | Twenty-four 2 g/kg IVIg were performed on average (range 3 to 100 infusions) per patient at a rate of one 3- to 5-day infusion every 4 to 8 weeks. Lower doses as part of maintenance infusion were not used.                                                   | <ul style="list-style-type: none"> <li>• No specific safety reported.</li> </ul>                                                                                                                                                                                                                                                                                                                                                                                                         |



|                          |                              |             |    |                                                                                 |                                                                                                                                                                                                                                                                                                                                   |
|--------------------------|------------------------------|-------------|----|---------------------------------------------------------------------------------|-----------------------------------------------------------------------------------------------------------------------------------------------------------------------------------------------------------------------------------------------------------------------------------------------------------------------------------|
| Nair V et al. (2012) [9] | Kidney transplant candidates | Case series | 15 | 1 g/kg dosing twice a month for 4 months (or until transplantation if earlier). | <ul style="list-style-type: none"> <li>• No specific safety reported.</li> <li>• 13 of 15 patients received the full 8 g/kg dose; one patient experienced extreme restlessness during treatments resulting in the termination of therapy after 5.5 g/kg and another patient received 4 g/kg and then was transplanted.</li> </ul> |
|--------------------------|------------------------------|-------------|----|---------------------------------------------------------------------------------|-----------------------------------------------------------------------------------------------------------------------------------------------------------------------------------------------------------------------------------------------------------------------------------------------------------------------------------|

IVIg = intravenous immunoglobulin.

## Supplementary references

1. Cherin P, Herson S, Wechsler B, Piette JC, Bletry O, Coutellier A, et al. Efficacy of intravenous gammaglobulin therapy in chronic refractory polymyositis and dermatomyositis: an open study with 20 adult patients. *Am J Med.* 1991;91:162–8. doi:10.1016/0002-9343(91)90009-m.
2. Dalakas MC, Illa I, Dambrosia JM, Soueidan SA, Stein DP, Otero C, et al. A controlled trial of high-dose intravenous immune globulin infusions as treatment for dermatomyositis. *N Engl J Med.* 1993;329:1993–2000. doi:10.1056/NEJM199312303292704.
3. Harman KE, Black MM. High-dose intravenous immune globulin for the treatment of autoimmune blistering diseases: an evaluation of its use in 14 cases. *Br J Dermatol.* 1999;140:865–74. doi:10.1046/j.1365-2133.1999.02817.x.
4. Engineer L, Bhol KC, Ahmed AR. Analysis of current data on the use of intravenous immunoglobulins in management of pemphigus vulgaris. *J Am Acad Dermatol.* 2000;43:1049–57. doi:10.1067/mjd.2000.108366.
5. Levy Y, Sherer Y, Langevitz P, Lorber M, Rotman P, Fabrizzi F, Shoenfeld Y. Skin score decrease in systemic sclerosis patients treated with intravenous immunoglobulin--a preliminary report. *Clin Rheumatol.* 2000;19:207–11. doi:10.1007/s100670050158.
6. Dalakas MC, Fujii M, Li M, Lutfi B, Kyhos J, McElroy B. High-dose intravenous immune globulin for stiff-person syndrome. *N Engl J Med.* 2001;345:1870–6. doi:10.1056/NEJMoa011167.
7. Vo AA, Lukovsky M, Toyoda M, Wang J, Reinsmoen NL, Lai C-H, et al. Rituximab and intravenous immune globulin for desensitization during renal transplantation. *N Engl J Med.* 2008;359:242–51. doi:10.1056/NEJMoa0707894.
8. Attarian S, Boucraut J, Hubert AM, Uzenot D, Delmont E, Verschueren A, et al. Chronic ataxic neuropathies associated with anti-GD1b IgM antibodies: response to IVIg therapy. *J Neurol Neurosurg Psychiatry.* 2010;81:61–4. doi:10.1136/jnnp.2009.185736.
9. Nair V, Sawinski D, Akalin E, Friedlander R, Ebcioğlu Z, Sehgal V, et al. Effect of high-dose intravenous immunoglobulin on anti-HLA antibodies in sensitized kidney transplant candidates. *Clin Transplant.* 2012;26:E261-8. doi:10.1111/j.1399-0012.2012.01657.x.
